# Supplementary material for: Facile preparation of a three-dimensional Fe3O4/macroporous graphene composite for high-performance Li storage
Source: Royal Society of Chemistry journal article supplement (doi:10.1039/c5ta01803j), 2015-01-01
Supplement: c5ta01803j1.pdf [file c5ta01803j1.pdf]

## **Facile preparation of three-dimensional Fe<sub>3</sub>O<sub>4</sub>/macroporous graphene composite for high-performance Li storage**

Xiaoyu Lu<sup>a</sup>, Ronghua Wang<sup>a</sup>, Yang Bai<sup>a</sup>, Jingjing Chen<sup>a</sup> and Jing Sun<sup>a\*</sup>

### **Supplementary Information**

---

\* Corresponding authors. Tel: +86 21 52414301. Fax: +86 21 52413122.

E-mail address: [jingsun@mail.sic.ac.cn](mailto:jingsun@mail.sic.ac.cn) (J. Sun)

**Table S1.** Zeta potential of various composites tested

| pH=5                | GO     | Fe(OH) <sub>3</sub> /GO | c-PS   |
|---------------------|--------|-------------------------|--------|
| Zeta Potential (mV) | -28.84 | 27.77                   | -54.40 |

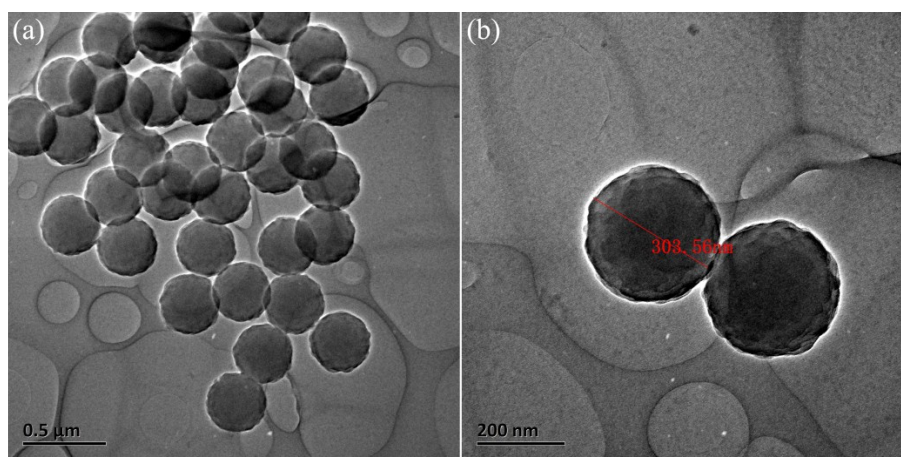

**Fig. S1** TEM images of as-prepared c-PS spheres at different magnification.

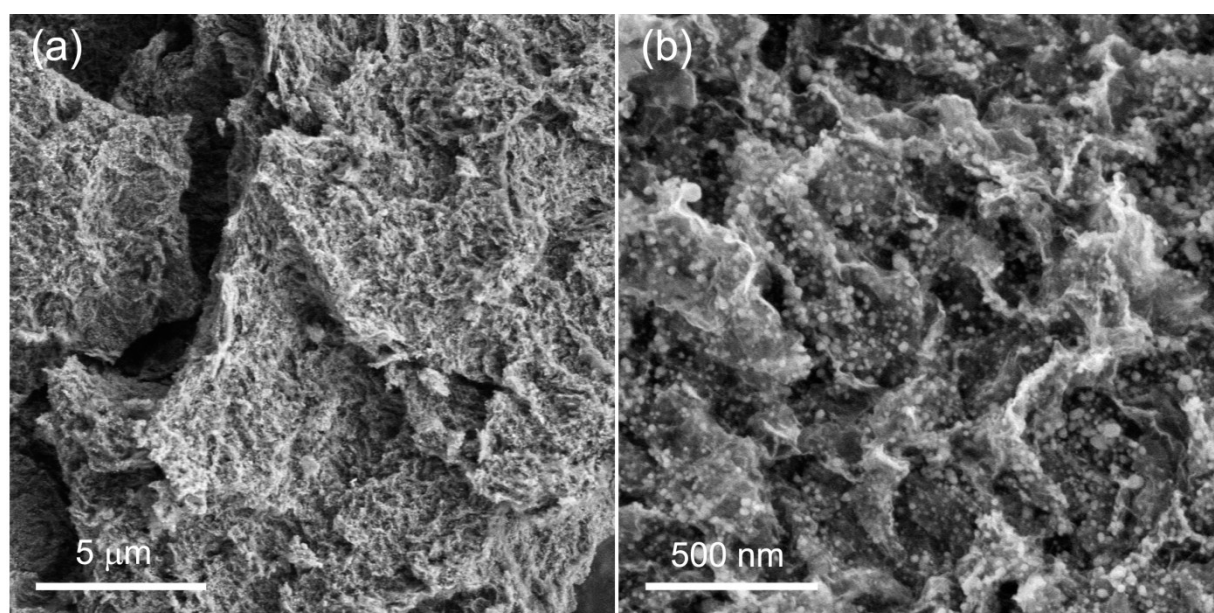

**Fig. S2** SEM images of the Fe<sub>3</sub>O<sub>4</sub>/GS at different magnification.

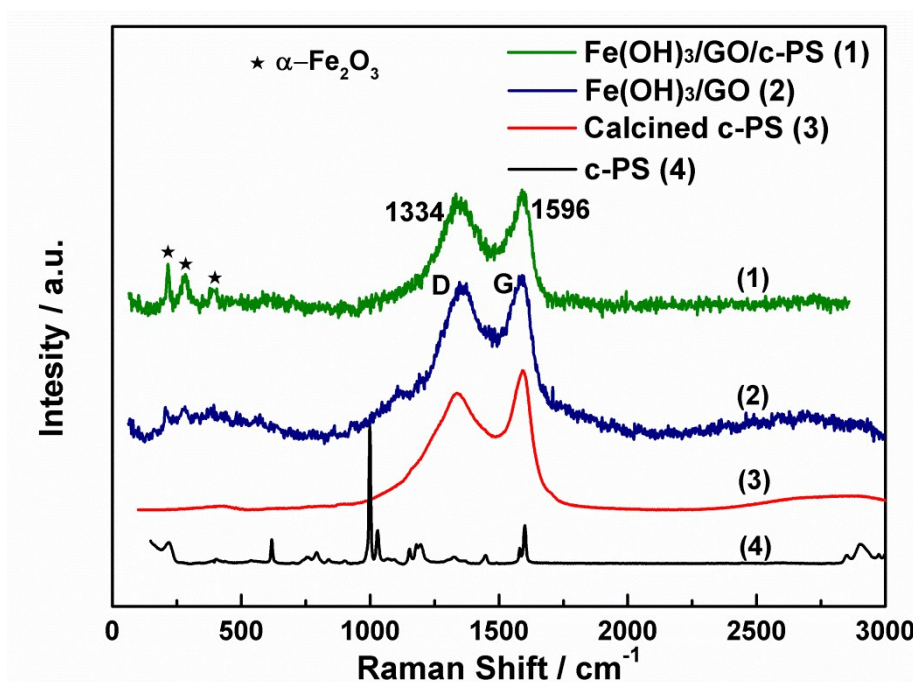

**Fig. S3** Raman spectra of Fe(OH)<sub>3</sub>/GO/c-PS, Fe(OH)<sub>3</sub>/GO, calcined c-PS and pristine c-PS.

**Table S2** Raman D and G band positions of different materials and the corresponding I<sub>D</sub>/I<sub>G</sub> value.

|                                    | FPG  | Fe <sub>3</sub> O <sub>4</sub> /GS | Fe(OH) <sub>3</sub> /GO/c-PS | Fe(OH) <sub>3</sub> /GO | GO   | Calcined c-PS |
|------------------------------------|------|------------------------------------|------------------------------|-------------------------|------|---------------|
| <b>D band / cm<sup>-1</sup></b>    | 1342 | 1334                               | 1332                         | 1348                    | 1341 | 1335          |
| <b>G band / cm<sup>-1</sup></b>    | 1585 | 1596                               | 1589                         | 1590                    | 1576 | 1590          |
| <b>I<sub>D</sub>/I<sub>G</sub></b> | 0.92 | 1.20                               | 0.93                         | 0.95                    | 0.81 | 0.84          |

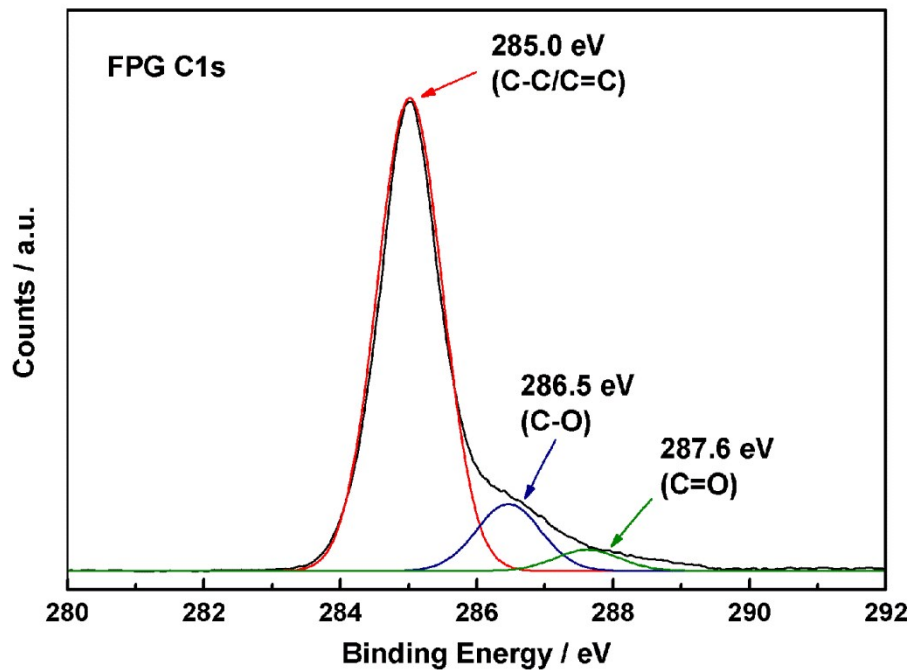

Fig S4. Core-level C 1s XPS spectrum of the FPG

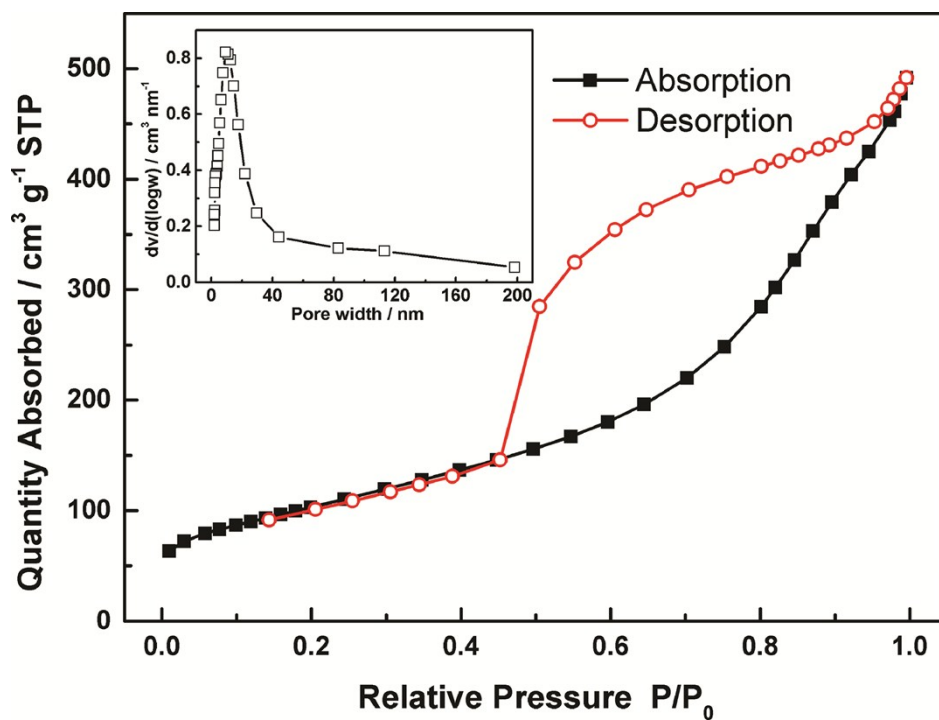

Fig. S5 Nitrogen adsorption/desorption isotherms of Fe<sub>3</sub>O<sub>4</sub>/GS and (d-inset) pore size distribution with BET surface of 371.9 m<sup>2</sup> g<sup>-1</sup>.

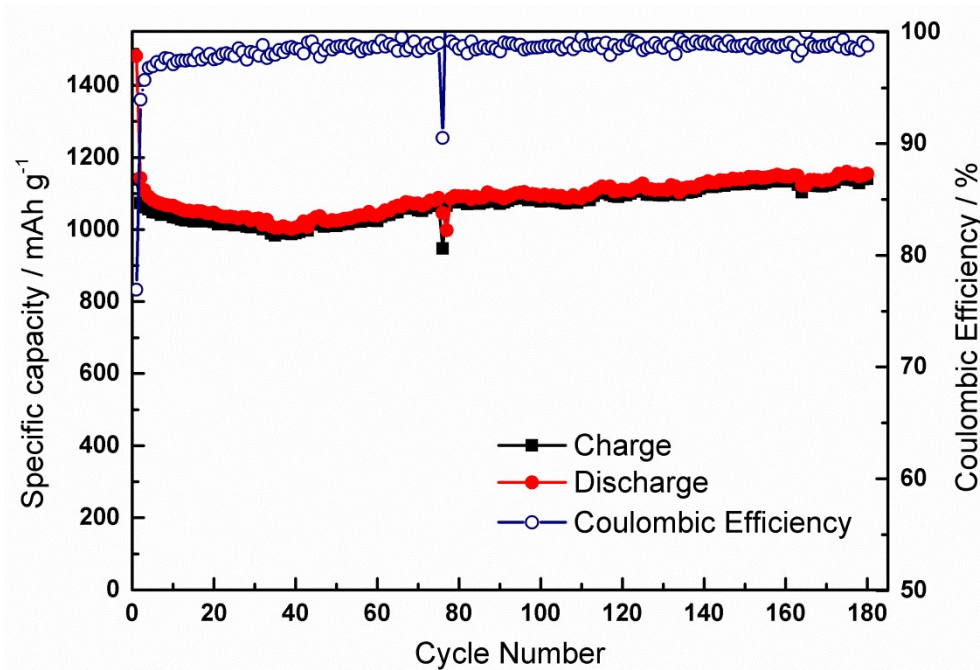

**Fig. S6** Cyclic performance and coulombic efficiency of FPG at current density of 100 mA g<sup>-1</sup>.

**Table S3** Examples of electrochemical performances of Fe<sub>3</sub>O<sub>4</sub>/graphene composites for LIBs

| Reference       | Fe <sub>3</sub> O <sub>4</sub> morphology | Graphene or graphene derivative | Electrochemical performance                                                                                                           |
|-----------------|-------------------------------------------|---------------------------------|---------------------------------------------------------------------------------------------------------------------------------------|
| <b>Our work</b> | NPs                                       | graphene                        | 1154 mAh g <sup>-1</sup> for 180 cycles (0.1 A g <sup>-1</sup> )<br>859 mAh g <sup>-1</sup> for 1000 cycles (2 A g <sup>-1</sup> )    |
| <b>1</b>        | NPs                                       | graphene                        | 950 mAh g <sup>-1</sup> for 85 cycles (0.035 A g <sup>-1</sup> )<br>600 mAh g <sup>-1</sup> for 100 cycles (0.7 A g <sup>-1</sup> )   |
| <b>2</b>        | NPs                                       | graphene                        | 1280 mAh g <sup>-1</sup> for 100 cycles (0.1C)<br>450 mAh g <sup>-1</sup> (10C 400 & 4C 400 cycles)                                   |
| <b>3</b>        | NPs                                       | graphene                        | 637 mAh g <sup>-1</sup> for 60 cycles (0.2 A g <sup>-1</sup> )<br>474 mAh g <sup>-1</sup> for 30 cycles (1.6 A g <sup>-1</sup> )      |
| <b>4</b>        | NPs                                       | graphene foam                   | 1060 mAh g <sup>-1</sup> for 85 cycles (0.93 A g <sup>-1</sup> )<br>363 mAh g <sup>-1</sup> for 60 cycles (4.8 A g <sup>-1</sup> )    |
| <b>5</b>        | hollow spindle                            | graphene                        | 940 mAh g <sup>-1</sup> for 50 cycles (0.2 A g <sup>-1</sup> )<br>660 mAh g <sup>-1</sup> for 50 cycles (0.5 A g <sup>-1</sup> )      |
| <b>6</b>        | NPs                                       | N-doped graphene                | 1130 mAh g <sup>-1</sup> for 200 cycles (0.1 A g <sup>-1</sup> )<br>648 mAh g <sup>-1</sup> for 40 cycles (1.6 A g <sup>-1</sup> )    |
| <b>7</b>        | NPs (carbon coating)                      | graphene                        | 1344 mAh g <sup>-1</sup> for 202 cycles (0.5C)<br>743 mAh g <sup>-1</sup> for another 200 cycles (2C)                                 |
| <b>8</b>        | NPs                                       | graphene foam                   | 1200 mAh g <sup>-1</sup> for 500 cycles (1C)<br>300 mAh g <sup>-1</sup> for 50 cycles (20C)                                           |
| <b>9</b>        | NPs                                       | graphene aerogel                | 1200 mAh g <sup>-1</sup> for 100 cycles (0.086 A g <sup>-1</sup> )<br>577 mAh g <sup>-1</sup> for 300 cycles (5.2 A g <sup>-1</sup> ) |

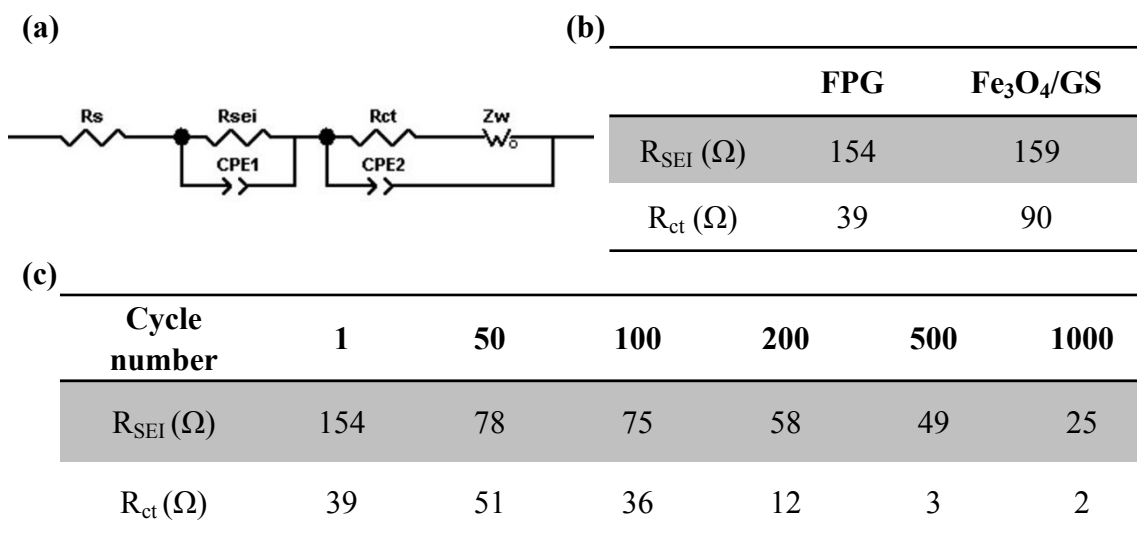

**Fig. S7** (a) Equivalent circuit model used for calculation of R<sub>SEI</sub> and R<sub>ct</sub> of FPG and Fe<sub>3</sub>O<sub>4</sub>/GS electrode; (b) R<sub>SEI</sub> and R<sub>ct</sub> results for FPG and Fe<sub>3</sub>O<sub>4</sub>/GS after the 1<sup>st</sup> discharge process at current density of 2 A g<sup>-1</sup>; (c) R<sub>SEI</sub> and R<sub>ct</sub> results of the FPG at different cycle numbers at current density of 2 A g<sup>-1</sup>.

#### References:

1. G. Zhou, D.-W. Wang, F. Li, L. Zhang, N. Li, Z.-S. Wu, L. Wen, G. Q. Lu and H.-M. Cheng, *Chemistry of Materials*, 2010, **22**, 5306-5313.
2. S. K. Behera, *Chemical communications*, 2011, **47**, 10371-10373.
3. J. Su, M. Cao, L. Ren and C. Hu, *The Journal of Physical Chemistry C*, 2011, **115**, 14469-14477.
4. W. Wei, S. Yang, H. Zhou, I. Lieberwirth, X. Feng and K. Mullen, *Advanced materials*, 2013, **25**, 2909-2914.
5. R. Wang, C. Xu, J. Sun, L. Gao and C. Lin, *Journal of Materials Chemistry A*, 2013, **1**, 1794.
6. Z. S. Wu, S. Yang, Y. Sun, K. Parvez, X. Feng and K. Mullen, *Journal of the American Chemical Society*, 2012, **134**, 9082-9085.
7. X. Jiang, X. Yang, Y. Zhu, Y. Yao, P. Zhao and C. Li, *J. Mater. Chem. A*, 2015, **3**, 2361-2369.
8. X. Hu, M. Ma, M. Zeng, Y. Sun, L. Chen, Y. Xue, T. Zhang, X. Ai, R. G. Mendes, M. H. Rummeli and L. Fu, *ACS applied materials & interfaces*, 2014, **6**, 22527-22533.
9. L. Fan, B. Li, D. W. Rooney, N. Zhang and K. Sun, *Chemical communications*, 2015, **51**, 1597-1600.
